# Supplementary material for: DNA methylation and transcriptional trajectories during human development and reprogramming of isogenic pluripotent stem cells
Source: PubMed Central journal article supplement (PMC5640655; doi:10.1038/s41467-017-01077-3), 2017-10-13
Supplement: 41467_2017_1077_MOESM3_ESM.pdf [file 41467_2017_1077_MOESM3_ESM.pdf]

## **Description of Additional Supplementary Files**

File Name: Supplementary Data 1

Description: Illumina 450K samples and matching RNA sequencing.

File Name: Supplementary Data 2

Description: Differentially expressed genes (unique) between W8 and W22.

File Name: Supplementary Data 3

Description: Delta beta of the probes associated with up- and downregulated (organ-specific) genes.

File Name: Supplementary Data 4

Description: Nearest loci associated with hyper- and hypomethylated organspecific DMRs.

File Name: Supplementary Data 5

Description: Hyper- and hypomethylated probes in hiPSCs.

File Name: Supplementary Data 6

Description: Gene ontology analysis of hyper- and hypomethylated probes in hiPSCs.
